# Supplementary material for: A Fe2O3–Fe3C heterostructure encapsulated into a carbon matrix for the anode of lithium-ion batteries
Source: Royal Society of Chemistry journal article supplement (doi:10.1039/d1cc03945h), 2021-01-01
Supplement: d1cc03945h1.pdf [file d1cc03945h1.pdf]

## **Fe<sub>2</sub>O<sub>3</sub>-Fe<sub>3</sub>C heterostructure encapsulated into carbon matrix for lithium-ion battery anode**

### **Experimental**

#### **Synthesis**

1 g ferric chloride (Alfa Aesar Co.), 1 g melamine (Sinopharm Chemical Reagent Co.) and 1 g glucose (Sinopharm Chemical Reagent Co.) were added into 30 mL ethanol under stirring and heated to 80 °C until forming a uniform turbid liquid. The turbid liquid was moved into an oven and dried to powder at 80 °C. Then the powder was heated to 800 °C for 4 h in N<sub>2</sub> atmosphere with a heating rate of 4 °C min<sup>-1</sup>. The prepared powder was Fe-Fe<sub>3</sub>C@C. Fe<sub>2</sub>O<sub>3</sub>-Fe<sub>3</sub>C@C, Fe<sub>2</sub>O<sub>3</sub>@C and Fe<sub>2</sub>O<sub>3</sub> were obtained by calcining Fe-Fe<sub>3</sub>C@C powder in the air at 400 °C for 3 h and 5 h and 800 °C for 3 h, respectively, with 5 °C min<sup>-1</sup> heating rate. The Fe<sub>3</sub>C@C was obtained by stirring Fe-Fe<sub>3</sub>C@C in 50mL 4wt% HCl for 6h.

#### **Characterization**

Powder X-ray diffraction data was obtained by a D/max-2200/PC (Rigaku, Japan) with Cu K $\alpha$  radiation at 3 KW at a scan rate of 2° min<sup>-1</sup>. A ZESS scanning electron microscope (SEM) was used to investigate the morphology. The micro morphology and lattice fringes were observed by a TEM. An TGA/SDTA851 (METTLER TOLEDO, China). Thermogravimetric analyzer (TGA) was used to observe the pyrolysis process with a heating rate of 10 °C min<sup>-1</sup> from 20 °C to 800 °C in the air. The X-ray photoelectron spectroscopy (XPS) data was provided by a Nexsa (Thermo Fisher, America).

#### **Electrochemical Measurement**

The electrode sheet is prepared by the following method: The test sample was mixed with conductive agent and the binder in the NMP at a mass ratio of 8:1:1, then the uniform slurry was spreaded on the copper foil with a 150  $\mu$ m preparer and dried for 8 h at 80 °C. Finally, the copper foil coated was cut into small discs with a diameter of 12 mm through a microtome. The coin cells were assembled in a glovebox (MBRAUN, Germany) filled with Ar gas, and using Li-metal as counter electrode, 1

M LiPF<sub>6</sub> in EC:EMC:DMC (1:1:1 in volume) as electrolyte, and polypropylene foil as the separator. The cycling, rating and GITT data of the cells were collected by a Land workstation (CT2001A, LAND, China). The CVs and EIS measurements were tested by an electrochemical analyzer (CHI760, China).

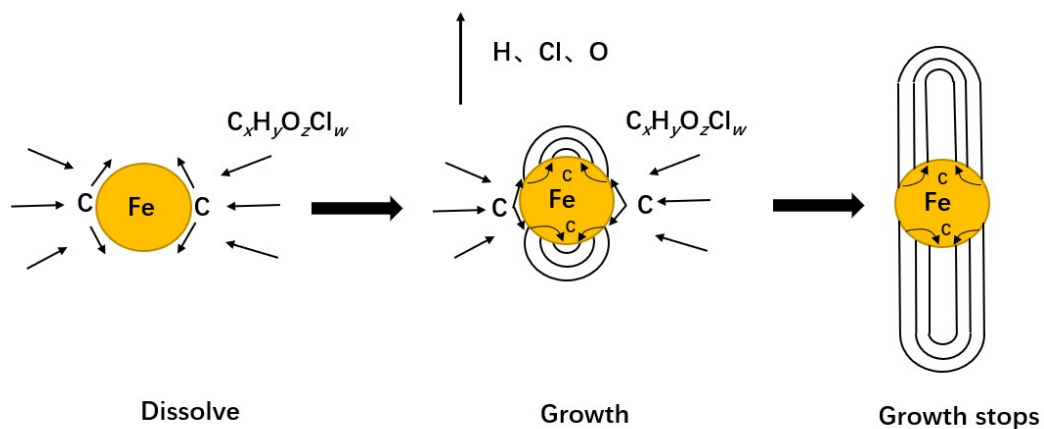

Fig S1. Growth mechanism for CNTs.

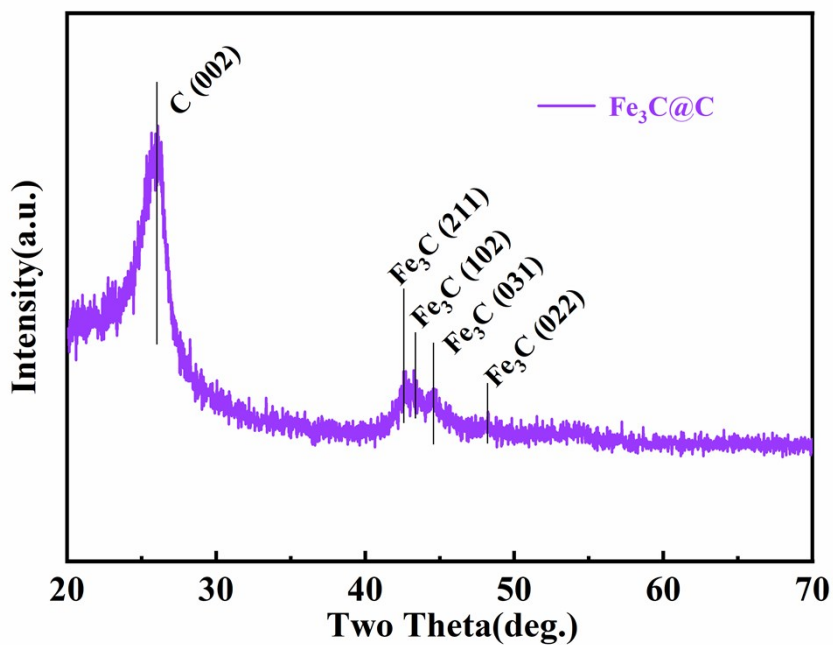

Fig S2. XRD diffraction patterns of  $Fe_3C@C$ .

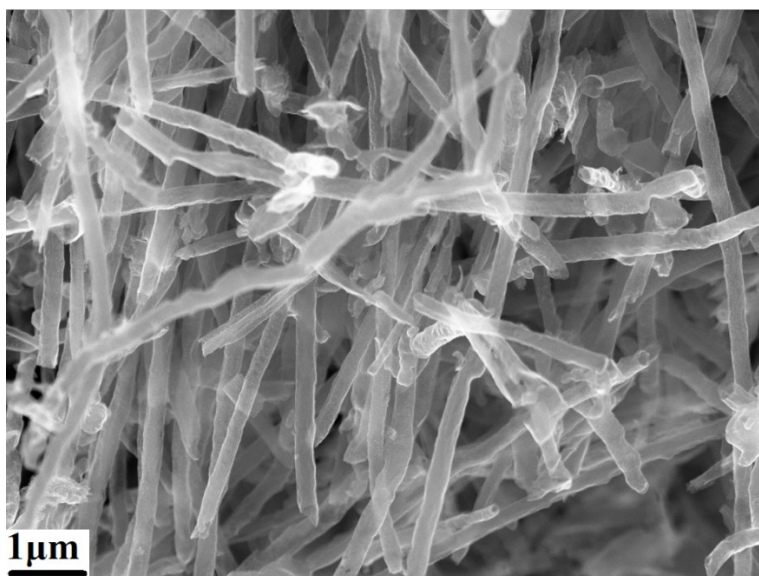

Fig S3. SEM image of  $\text{Fe}_3\text{C}@C$

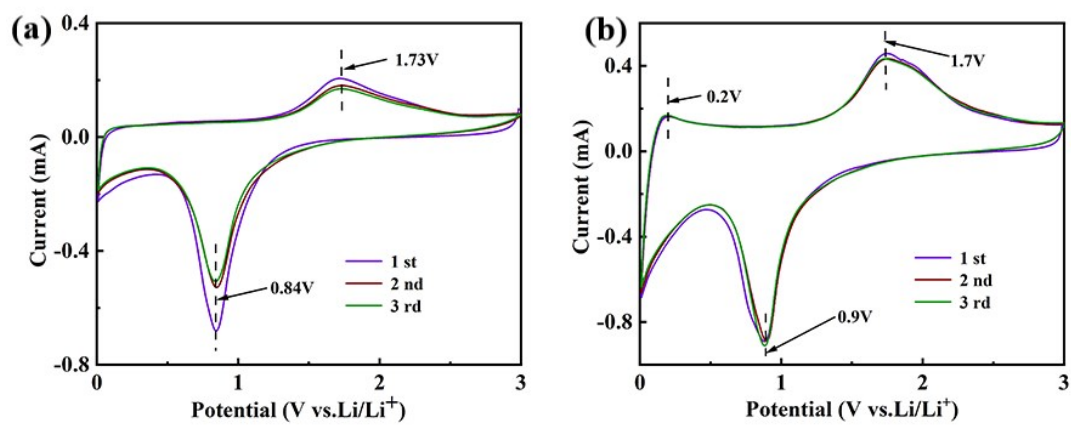

Fig S4. The CV curves of  $\text{Fe}_2\text{O}_3$  and  $\text{Fe}_2\text{O}_3\text{-Fe}_3\text{C}@C$ .

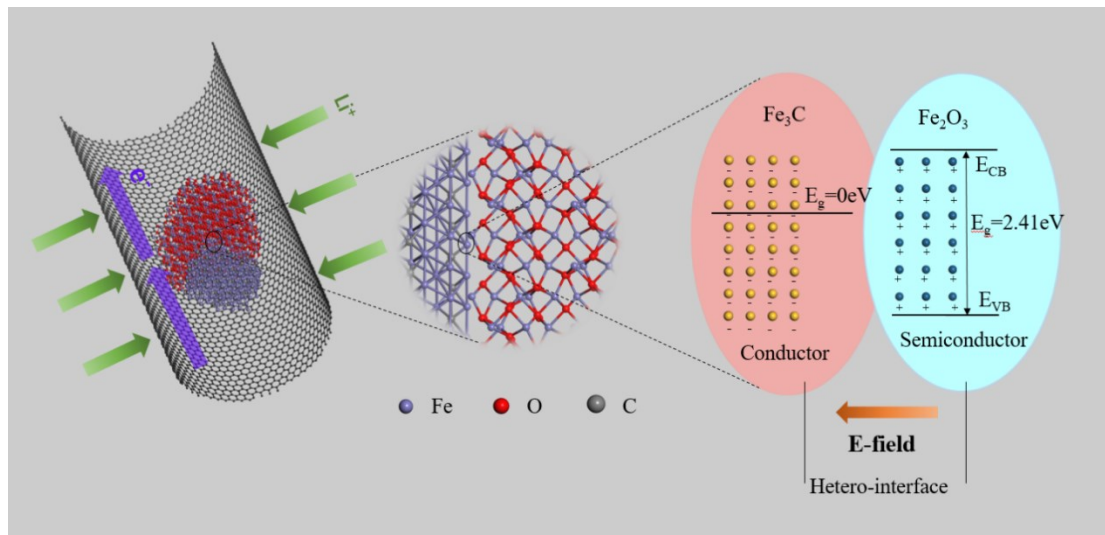

**Fig S5. Schematic illustration of the internal E-field for the  $\text{Fe}_2\text{O}_3\text{-Fe}_3\text{C@C}$  heterostructure.**
